# Supplementary material
Source: Springer Nature journal article supplement (https://www.springermedizin.de/resource/supplementary/12885_2012_3885_MOESM6_ESM.pdf/9464692)

**a**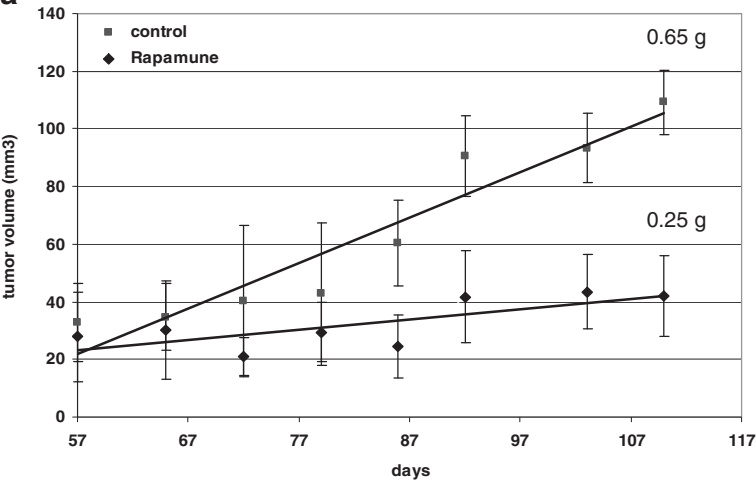**b**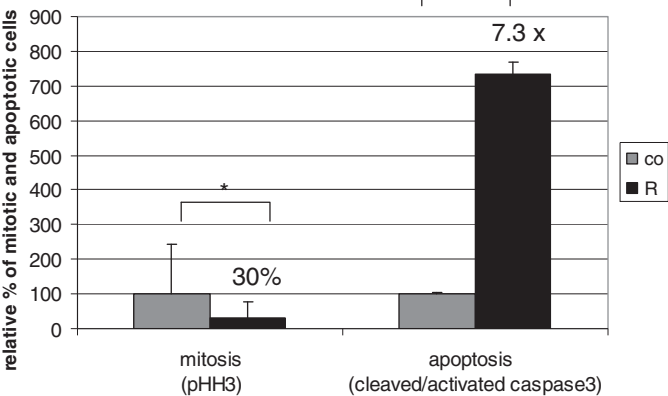

Supplement: MOESM6 [file 9464692]
